# Supplementary material
Source: PubMed Central journal article supplement (PMC6358682)
Supplement: pnas.1804858116.sapp.pdf [file pnas.1804858116.sapp.pdf]

## Supporting Information for

Arid1a is essential for intestinal stem cells through Sox9 regulation

Yukiko Hiramatsu, Akihisa Fukuda, Satoshi Ogawa, Norihiro Goto, Kozo Ikuta, Motoyuki Tsuda, Yoshihide Matsumoto, Yoshito Kimura, Takuto Yoshioka, Yutaka Takada, Takahisa Maruno, Yuta Hanyu, Tatsuaki Tsuruyama, Zhong Wang, Haruhiko Akiyama, Shigeo Takaishi, Hiroyuki Miyoshi, Makoto Mark Taketo, Tsutomu Chiba and Hiroshi Seno

Correspondence: Akihisa Fukuda MD, PhD  
Email: [fukuda26@kuhp.kyoto-u.ac.jp](mailto:fukuda26@kuhp.kyoto-u.ac.jp)

### **This PDF file includes:**

*SI Appendix*, Material and Methods  
*SI Appendix*, Fig. S1 to S9  
*SI Appendix*, Table S1 to S2  
References for SI reference citations

## **Materials and Methods**

### **Histologic analyses and immunostaining**

For histologic analyses, mouse organs were isolated and fixed overnight in 4% paraformaldehyde, embedded in paraffin, and sectioned at a thickness of 5  $\mu\text{m}$ . Sections were then deparaffinized, rehydrated, and stained with hematoxylin and eosin (H&E) or alcian blue, and counterstained with nuclear fast red (KPL). For immunohistochemical analyses, sections were incubated overnight at 4°C with primary antibody and washed with PBS. Washed sections were incubated with biotinylated secondary antibody for 1 hour at room temperature. Sections were then incubated with avidin biotin-peroxidase complex (Vector Laboratories), labeled with peroxidase, and coloured with diaminobenzidine substrate (Dako). For immunofluorescence, sections were incubated overnight at 4°C with primary antibody and washed with PBS. Washed sections were incubated with fluorescence conjugated secondary antibody (Invitrogen) for 1 hour at room temperature. Primary antibodies used in this study were obtained from the indicated suppliers: rabbit anti-Arid1a (1:500; ab182560, Abcam), mouse anti-Arid1b (1:200; ab57461, Abcam), rabbit anti-lysozyme (1:200; ab108508, Abcam), rabbit anti-Mmp7 (1:100; 3801S, Cell Signaling Technology), rabbit anti-chromogranin A (1:100; ab15160, Abcam), rabbit anti-Dclk1 (1:200; ab31704, Abcam), rat anti-Ki67 (1:100; 652402, BioLegend), rabbit anti-cleaved caspase 3 (1:200; 9664S, Cell Signaling Technology), mouse anti-E-cadherin (1:100; 610182, BD Transduction Laboratories), chicken anti-GFP (1:200; ab13970, Abcam), rat anti-Musashi-1 (1:1000; a gift from Dr. Okano, Keio University, School of Medicine, Department of Physiology, Tokyo, Japan), rabbit anti-Sox9 (1:10000; AB5535, Millipore), rabbit anti-Villin-1 (1:100; 2369S, Cell Signaling Technology), and rabbit anti-Hes1 (1:10000, gift from Dr. Sudo). Antigen retrieval for all primary antibodies was achieved by boiling in 10 mM citrate buffer pH 6.0 for 15 min. For quantitative analysis, cell counting or measurement was performed in at least ten sections from three animals for each genotype.

### **Electron microscopy**

Electron microscopic analysis was performed using the standard method for mice. The mouse small intestine was placed in 4% paraformaldehyde with 2% glutaraldehyde for a minimum of 12 hours, and cut into 1 mm thick coronal sections. Next, sections were post-fixed in 1.0% osmium tetroxide in 100 mM phosphate buffer, pH 7.4, for 2 hours at room temperature, and dehydrated in a series of graded ethanol solutions. After immersion in propylene oxide, samples were immersed in a mixture (1:1) of propylene oxide and Epon812 (LUVEAC-812, Nacalai Tesque, Japan) for 1.5 hours. Samples were then immersed in a mixture (1:3) of propylene oxide and Epon812 for 1.5 hours and finally immersed in only Epon812 for 12 hours. After immersion, samples were embedded in Epon812 resin according to the inverted beam capsule procedure and polymerized at 60°C for 3 days. The tissue samples were cut into ultrathin sections (70 nm) on an EM UC6 ultramicrotome (Leica, Germany). The ultrathin sections were examined with an H7650 electron microscope (Hitachi, Japan).

### **Crypt isolation**

Crypts were isolated according to the protocol described previously(1-4). First, intestines were flushed with phosphate-buffered saline (PBS) and incised longitudinally after which villi were removed mechanically by scraping. Sections (0.5 mm) were incubated in EDTA (5 mM)/PBS for 30 min at 4°C per fraction of epithelium. After incubation, the epithelium was separated by vigorous shaking and the remaining intestinal tissue was placed in a new tube for collection of subsequent fractions. After isolation, crypt cells were pelleted, and passed through a 100  $\mu\text{m}$  cell strainer.

### **qRT-PCR**

Total RNA was extracted from tissues or isolated crypts using the RNeasy Micro Kit (Qiagen). Single-strand cDNA was synthesized using a Transcriptor First Strand cDNA Synthesis Kit (Roche Applied Science). Q-PCR was performed using SYBR Green I Master (Roche Applied Science) and LightCycler 480 (Roche Applied Science). Values were expressed as arbitrary units relative to GAPDH. Primers are listed in *SI Appendix*, Table S2.

### **Microarray analysis**

Total RNA from isolated crypts of *Arid1a<sup>ff</sup>* and *Villin-Cre; Arid1a<sup>ff</sup>* mice intestines was examined using the SurePrint G3 Mouse GE v2 8x60K Microarray (Agilent). The raw data were quantified by Agilent Feature Extraction software (Agilent Technologies). Quantified data were normalized by the Gene Spring 14.5 software (Agilent Technologies). Unnamed genes were excluded. Differential expression analysis was performed using edgeR. As previously described, gene expression data were analyzed using the GSEA software and the Molecular Signature Database (MSigDB) provided by the Broad Institute of MIT and Harvard(5). The complete microarray data set is available from GEO (GSE110181).

### **$\beta$ -Galactosidase (LacZ) staining**

Freshly isolated small intestines were incubated in ice-cold fixative solution (PBS containing 4% paraformaldehyde, 5 mmol/L EGTA, 2 mmol/L MgCl<sub>2</sub>, 0.2% glutaraldehyde, and 0.02% NP-40) for 1 hour at 4°C. After washing twice in PBS for 20 minutes, tissues were incubated overnight at room temperature with LacZ substrate (PBS containing 5 mmol/L K<sub>3</sub>Fe(CN)<sub>6</sub>, 5 mmol/L K<sub>4</sub>Fe(CN)<sub>6</sub>, 2 mmol/L MgCl<sub>2</sub>, 0.02% NP-40, 0.1% sodium deoxycholate, and 1 mg/mL X-galactosidase). After washing twice in PBS for 20 minutes, tissues were fixed overnight at 4°C in 4% paraformaldehyde in PBS. Paraformaldehyde was removed, and the stained tissues were transferred to tissue cassettes.

### **Spheroid culture**

Conditioned medium of L-cell line secreting Wnt3a, R-spondin3, and Noggin (L-WRN CM) was prepared as described previously(6). L-WRN was purchased from ATCC (ATCC; CRL3276). Isolated crypts of the proximal small intestine were embedded in Matrigel (BD Biosciences). For spheroid culture of normal epithelium, 50% L-WRN CM supplemented with 5  $\mu$ mol/L Y-27632 (Tocris Bioscience) was added to each well. No passages were performed.

### **ChIP-qPCR and ChIP-Seq**

SimpleChIP Plus Enzymatic Chromatin IP Kit (Magnetic Beads) (#9005, Cell Signaling Technology) was used for ChIP assay. Primers were designed as described previously and listed *SI Appendix*, Table S2. Negative control antibody (IgG) was included in the SimpleChIP Plus Enzymatic Chromatin IP Kit. Rabbit anti-Arid1a antibody (1:100; #12354, Cell Signaling Technology) was used in this study. Sequencing libraries were prepared using the TruSeq ChIP Sample Prep Kit (Illumina) following the manufacturer's instructions. The libraries were sequenced on the HiSeq 2500 sequencing platform using HiSeq SBS Kit v4 reagents with 2 x 101 cycles. ChIP-Seq reads were mapped to the mouse reference genome (mm10) by Bowtie (version 1.1.1). Enriched-regions (peaks) were determined using MACS2 peak caller (version 2.9.10) with a q-value cutoff of 0.05. Peaks were annotated by in-house scripts. MEME software (version 1.10.1) was used to identify the binding motif. GO analysis of all gene targets identified by peak calling analysis was performed as follows: GO databases were downloaded from <http://geneontology.org/>. Fold Enrichment was the ratio of the number of genes observed in our gene list to the number of gene expected in the reference list. The *P*-values were the probability that the number of genes observed in the category occurred by chance (randomly), as determined by the reference list. The complete ChIP-Seq data set is available from GEO (GSE121658).

### **Statistical analysis**

All values are presented as mean  $\pm$  SEM unless otherwise stated. The two-tailed Student's t-test was used for individual pairwise comparisons. All the data were checked for normal distribution. If the data were not normally distributed, we used Welch's t test. The Tukey-Kramer HSD (honestly significant difference) test was used for multiple pairwise comparisons. The Dunnett test was used for each groups of multiple pairwise versus control. The log-rank test was for statistical analysis of Kaplan-Meier survival curves. P values  $< 0.05$  were considered significant. All statistical analysis were performed with either Graph-Pad Prism (version 6.0, GraphPad, San Diego, CA) or JMP Pro (version 13.0, SAS, Cary, NC).

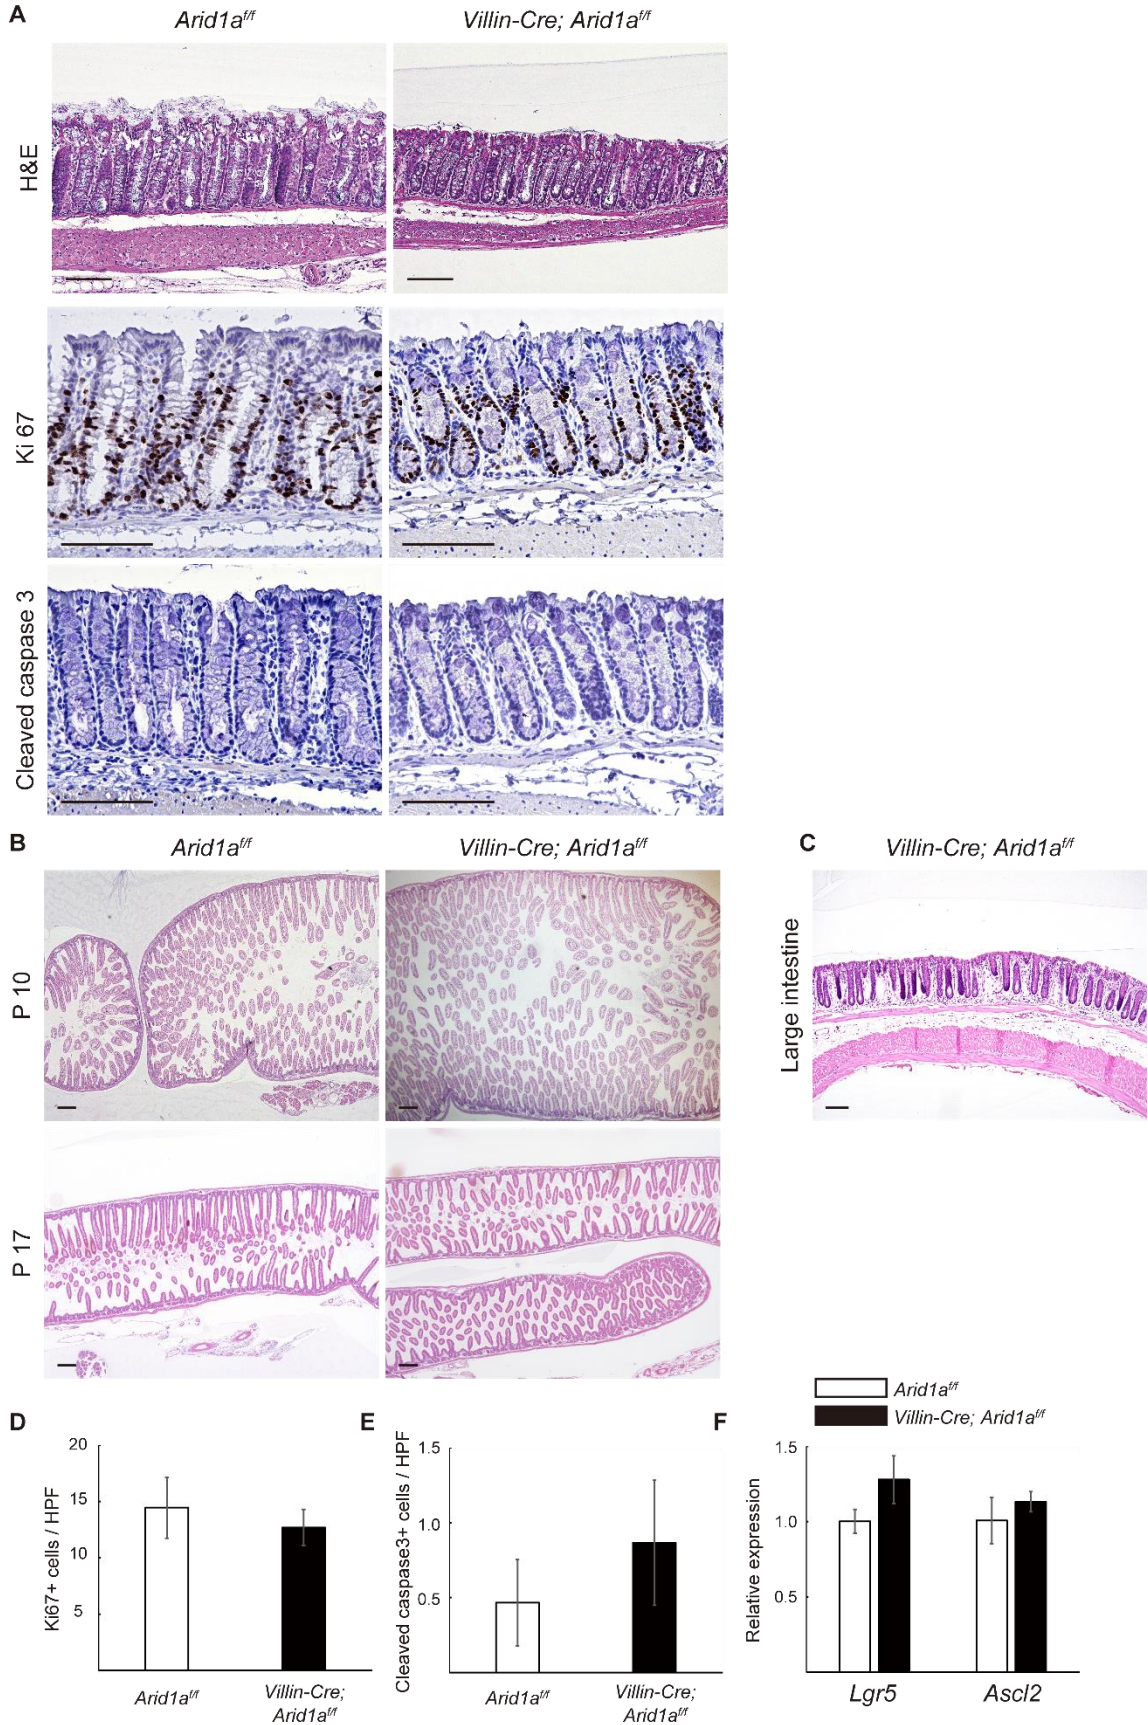

**Fig. S1. Intestinal *Arid1a*-deletion causes no differences in the large intestines of mice**

(A) From the top: H&E, Ki67, and cleaved caspase 3 staining of the large intestine in control (left panel) and *Villin-Cre; Arid1a<sup>ff</sup>* mice (right panel) at 9 weeks of age. (B) H&E staining of the small intestine in control (left panel) and *Villin-Cre; Arid1a<sup>ff</sup>* mice (right panel) at the indicated time points. (C) H&E staining of the large intestine in *Villin-Cre; Arid1a<sup>ff</sup>* mice at 65 weeks of age. (D) The number of Ki67 positive cells in the large intestine of control and *Villin-Cre; Arid1a<sup>ff</sup>* mice at 9 weeks of age (n = 3). (E) The number of cleaved caspase 3 positive cells in the large intestine of control and *Villin-Cre; Arid1a<sup>ff</sup>* mice at 9 weeks of age (n = 3). (F) Relative expression level of ISC markers in control and *Villin-Cre; Arid1a<sup>ff</sup>* mice, as determined by q-PCR using crypt RNA at 9 weeks of age (n=3). Scale bars: 100  $\mu$ m (A, C), 200  $\mu$ m (B). Quantitative data are presented as means  $\pm$  S.D.

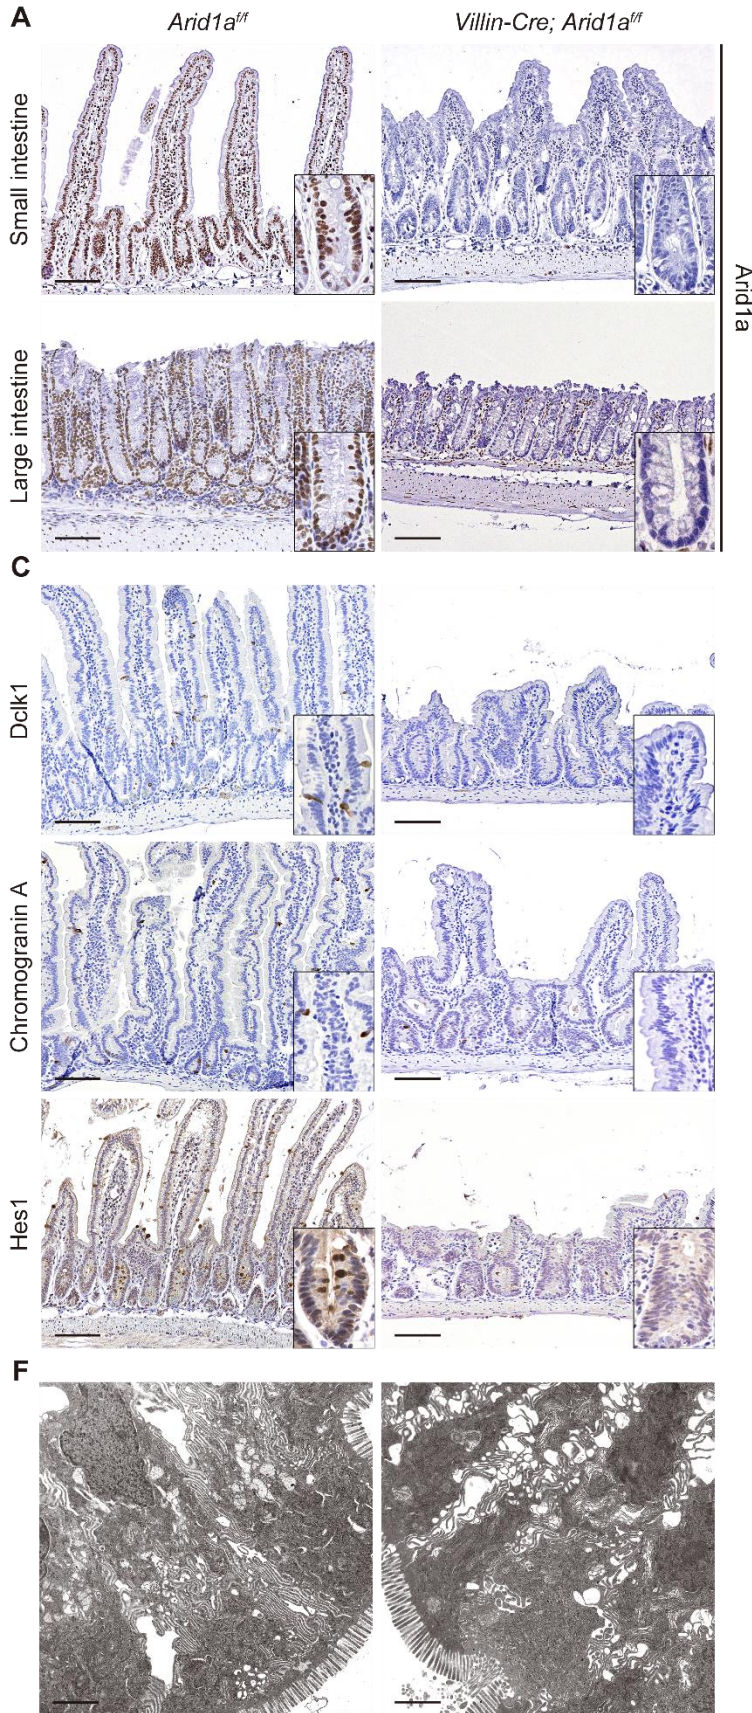

**Fig. S2. Intestinal *Arid1a*-deletion causes no differences in the number of tuft and enteroendocrine cells**

(A) *Arid1a* staining of the small intestine (top) and large intestine (bottom) in control (left panel) and *Villin-Cre; Arid1a<sup>ff</sup>* mice (right panel) at 8 to 9 weeks of age. (B) Relative expression level of *Arid1a* in control (n = 3) and *Villin-Cre; Arid1a<sup>ff</sup>* mice (n = 5), as determined by q-PCR using crypt RNA at 8 weeks of age. (C) From the top: *Dclk1*, chromogranin A, and *Hes1* staining of the small intestines in control (left panel) and *Villin-Cre; Arid1a<sup>ff</sup>* mice (right panel) at 8 to 10 weeks of age. (D-E) Ratio of the number of tuft (D) and enteroendocrine cells (E) to all villus cells in control and *Villin-Cre; Arid1a<sup>ff</sup>* mice at 8 to 10 weeks of age (n = 3). (F) Electron microscopic images of the intestines from control (left panel) and *Villin-Cre; Arid1a<sup>ff</sup>* mice (right panel). Scale bars: 100  $\mu$ m (A, C), 2  $\mu$ m (F). Quantitative data are presented as means  $\pm$  S.D. \*\*  $P < 0.01$ .



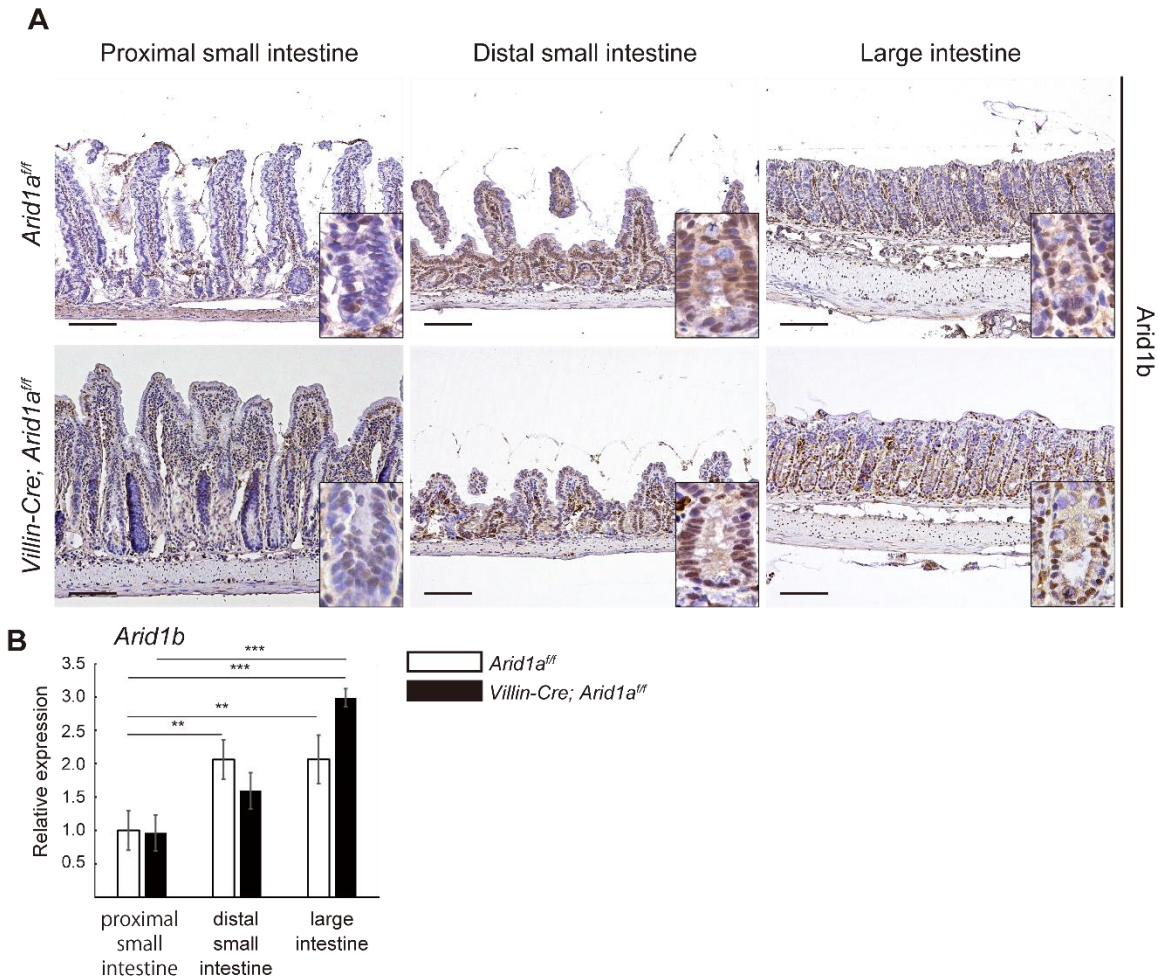

**Fig. S3. *Arid1b* expression is higher in the distal small intestine and large intestine compared to the proximal small intestine**

(A) *Arid1b* staining of the proximal (left panel) and distal small intestine (middle panel) and the large intestine (right) in control *Arid1a<sup>ff</sup>* (top) and *Villin-Cre; Arid1a<sup>ff</sup>* mice (bottom panel) at 9 weeks of age. Scale bars: 100  $\mu$ m. (B) Relative expression level of *Arid1b* in the proximal and distal small intestine and the large intestine of control *Arid1a<sup>ff</sup>* and *Villin-Cre; Arid1a<sup>ff</sup>* mice, as determined by q-PCR using whole tissue RNA at 9 weeks of age (n = 3). Quantitative data are presented as means  $\pm$  S.D. \*\*  $P < 0.01$ , \*\*\*  $P < 0.001$ .

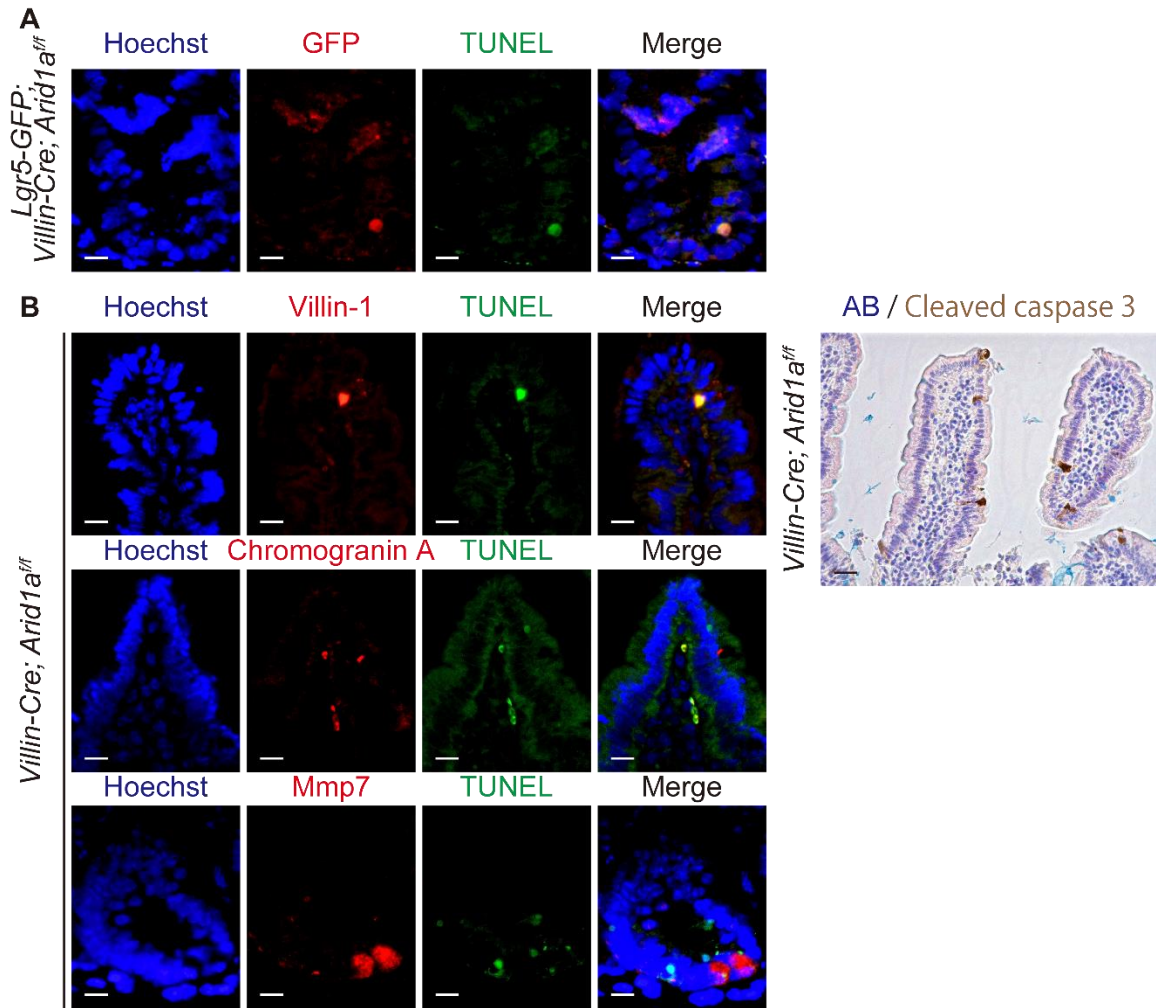

**Fig. S4. Apoptosis occurs in both  $Lgr5^+$  ISC in crypts and enterocytes in the villi of *Villin-Cre; Arid1a<sup>ff</sup>* mice**

(A) Co-staining for GFP/TUNEL/Hoechst in *Lgr5-GFP; Villin-Cre; Arid1a<sup>ff</sup>* mice at 8 weeks of age. (B) Co-staining for Villin-1/TUNEL/Hoechst, chromogranin A/TUNEL/Hoechst, Mmp7/TUNEL/Hoechst, and alcian blue (AB)/cleaved caspase 3 in *Villin-Cre; Arid1a<sup>ff</sup>* mice at 8 weeks of age. Scale bars: 100  $\mu$ m (A, B).

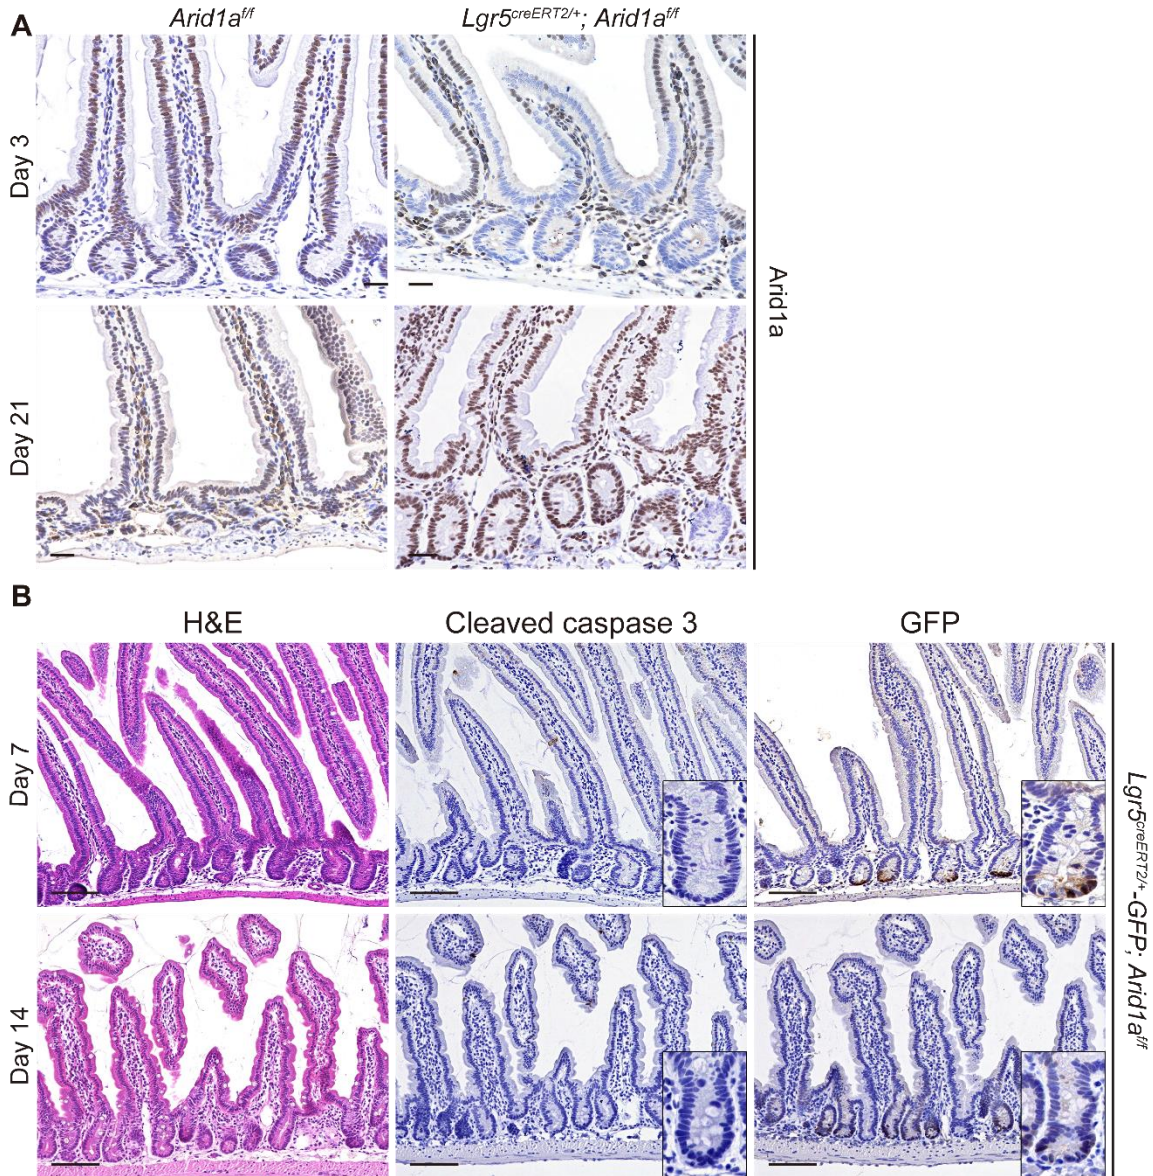

**Fig. S5. Intestinal *Arid1a*-deletion in *Lgr5*<sup>+</sup> ISCs does not perturb homeostasis in the small intestine at 1 and 2 weeks after *Arid1a*-deletion in *Lgr5*<sup>+</sup> ISCs**

(A) *Arid1a* staining of control *Arid1a<sup>fl/fl</sup>* (left panel) and *Lgr5<sup>CreERT2/+</sup>; Arid1a<sup>fl/fl</sup>* mice (right panel) at 3 and 21 days after the last tamoxifen injection. (B) IHC analysis for H&E, cleaved caspase 3, and GFP in *Lgr5<sup>CreERT2/+</sup>-GFP; Arid1a<sup>fl/fl</sup>* intestines at 1 and 2 weeks after the last tamoxifen injection. Scale bars: 50  $\mu$ m (A), 100  $\mu$ m (B).

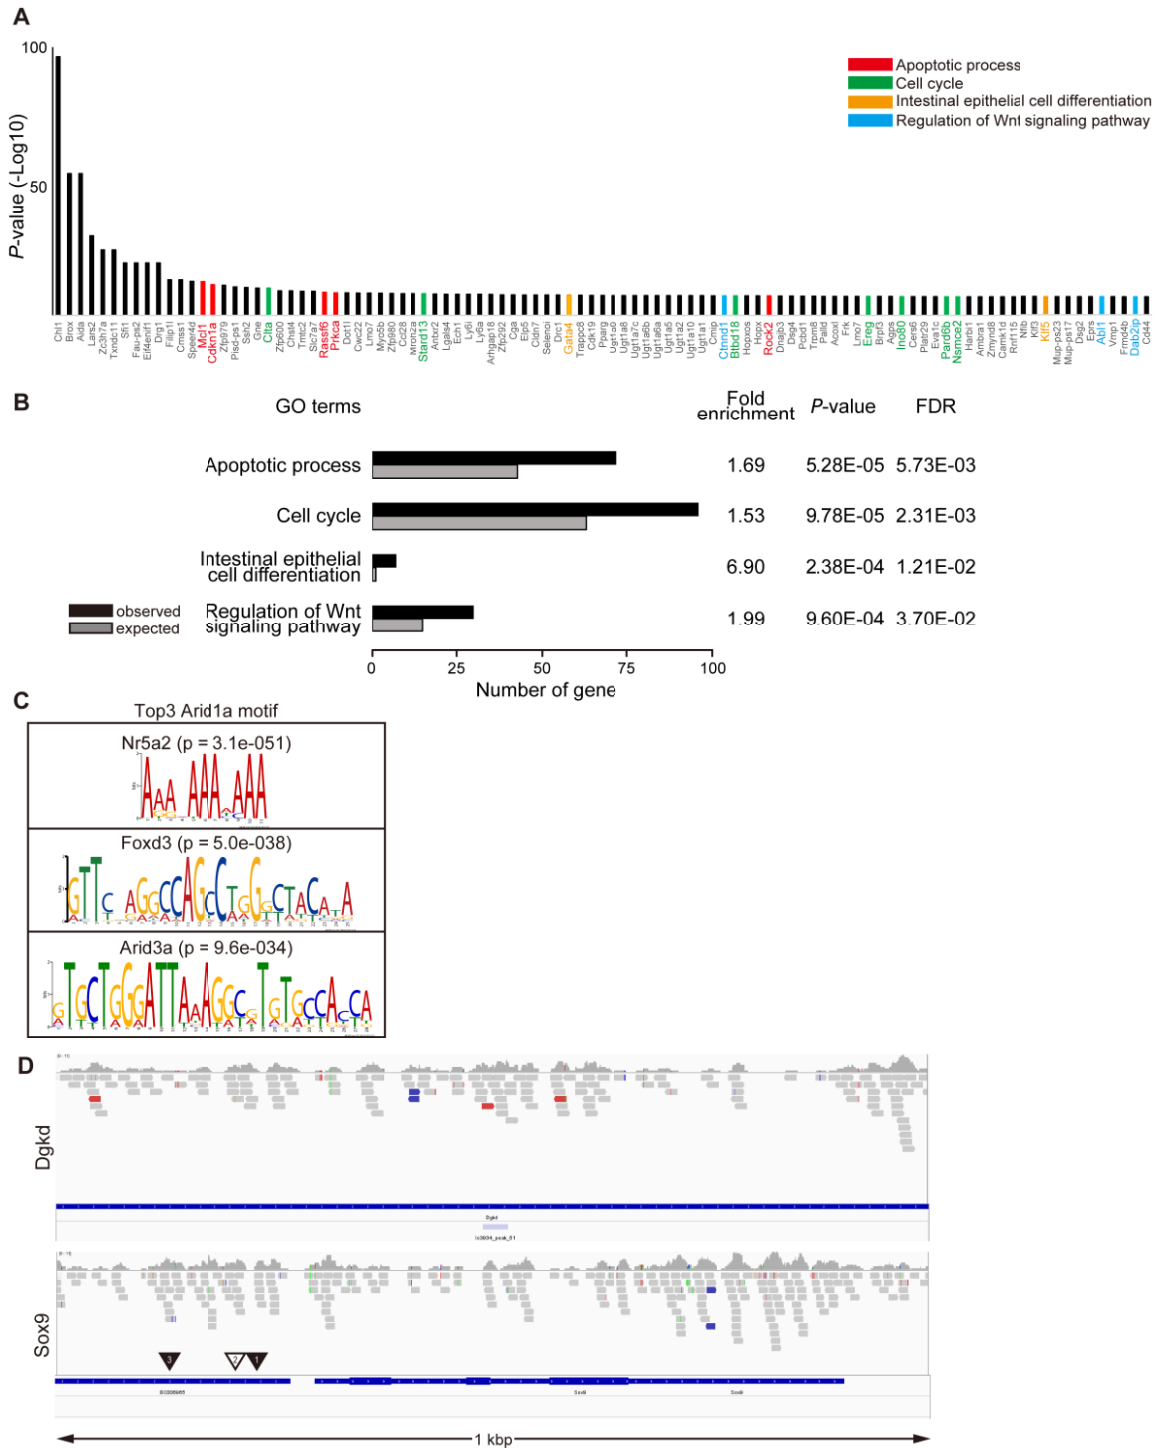

**Fig. S6. Arid1a regulates various gene expression**

(A) Depicted are the top100 gene targets in the intestine with minimum  $P$ -values identified by ChIP-Seq peak calling analysis. (B) Summary of results from Gene Ontology analysis. (C) The binding sites are associated with DNA sequence-specific motifs that overlap with Nr5a2, Foxd3, and Arid3a motifs. (D) Sequencing coverage histograms that aligned to *Dgkd* (top) and *Sox9* (bottom). The black triangles indicate the DNA binding sites (site 1 and site 3) as confirmed by ChIP assay. The white triangle indicates the additional DNA binding site (site 2). Red line: The insert size of paired

reads is greater than 1000 bp. Blue line: The insert size of paired reads is smaller than 50 bp. Green line: The orientation of paired reads is anomalous.

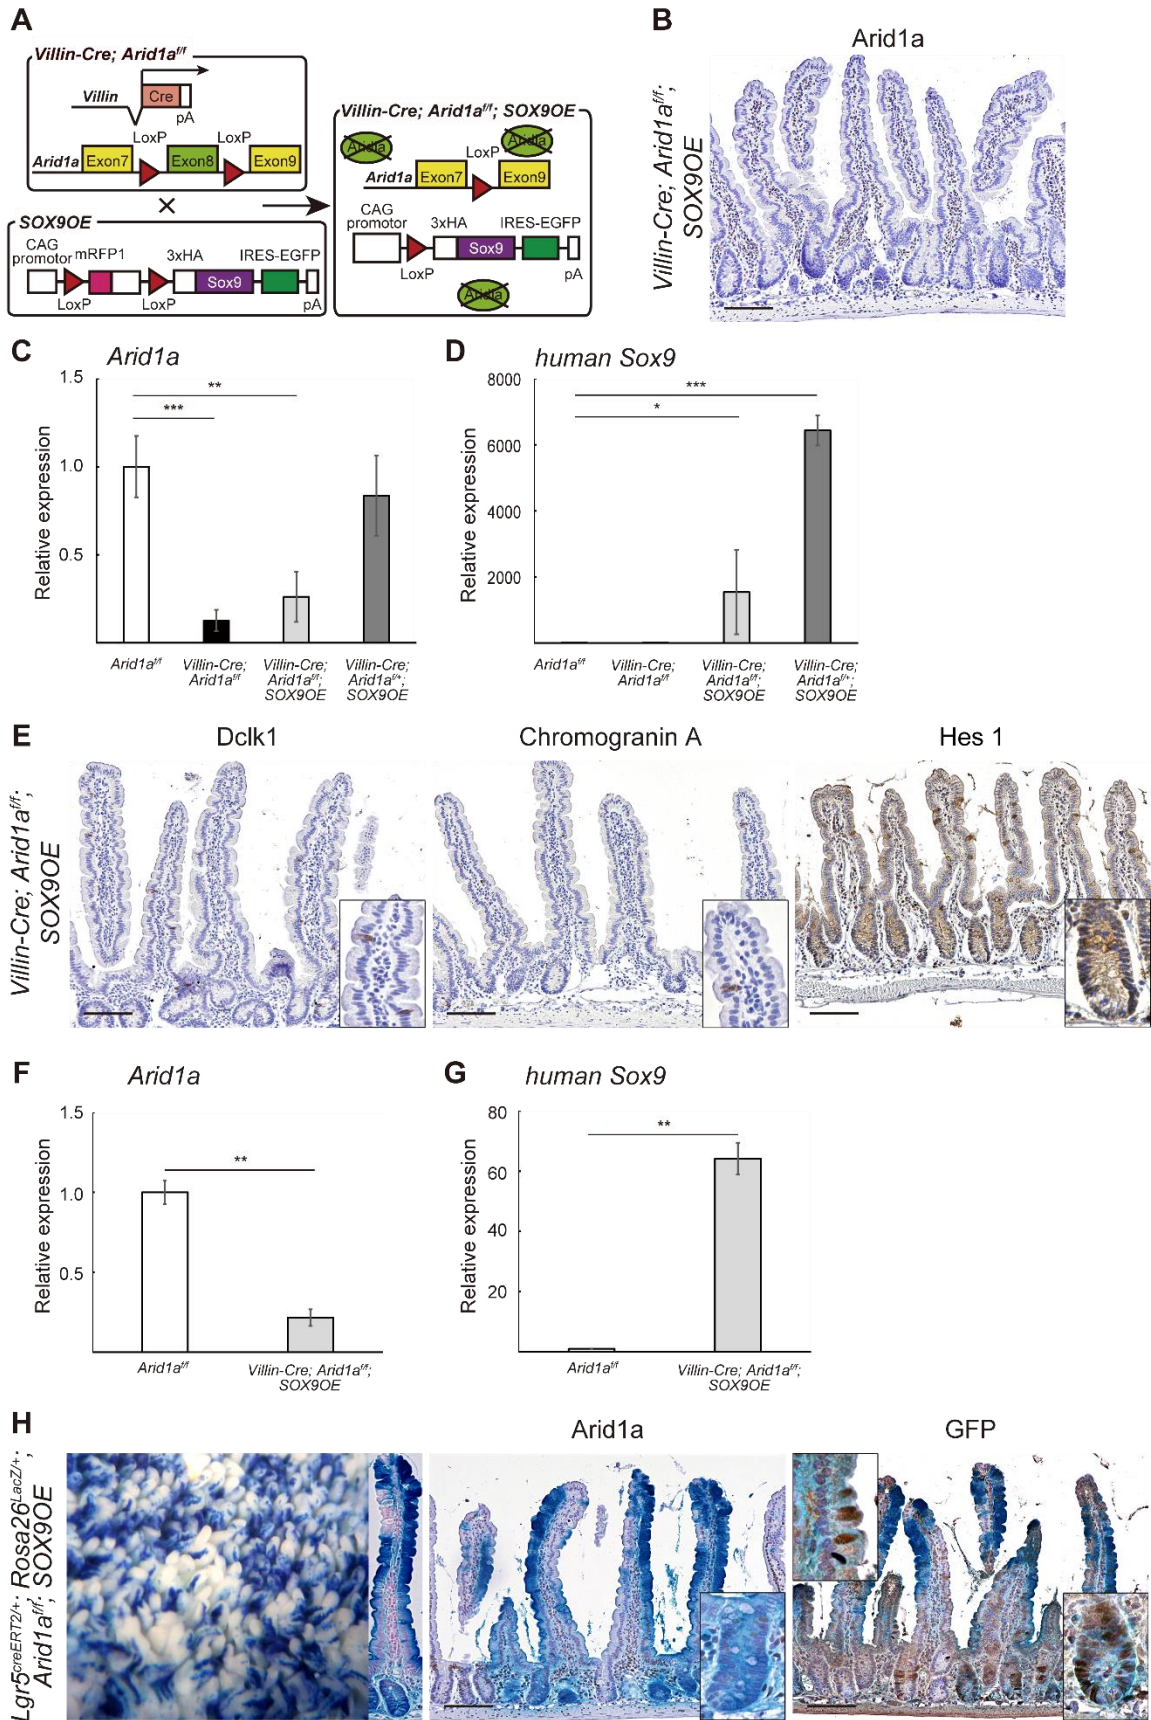

**Fig. S7. Expression of *Arid1a* and *Sox9* in *Villin-Cre; Arid1a<sup>ff</sup>; SOX9OE* intestines, spheroids generated from *Villin-Cre; Arid1a<sup>ff</sup>; SOX9OE* intestines, and in *Lgr5<sup>CreERT2/+</sup>; Rosa<sup>lacZ/+</sup>; Arid1a<sup>ff</sup>; SOX9OE* mice**

(A) Schema of recombination in *Villin-Cre; Arid1a<sup>ff</sup>; SOX9OE* mice. (B) Staining for *Arid1a* in *Villin-Cre; Arid1a<sup>ff</sup>; SOX9OE* mice at 8 weeks of age. (C-D) Relative expression levels of *Arid1a* (C) and human *Sox9* (D) in control *Arid1a<sup>ff</sup>* (n = 3), *Villin-Cre; Arid1a<sup>ff</sup>* (n = 5), *Villin-Cre; Arid1a<sup>ff</sup>; SOX9OE* (n = 3), and *Villin-Cre; Arid1a<sup>ff/+</sup>; SOX9OE* (n = 3) intestines, as determined by q-PCR using crypt RNA at 8 weeks of age. (E) Staining for *Dclk1* (left panel), chromogranin A (middle panel), and *Hes1* (right panel) in *Villin-Cre; Arid1a<sup>ff</sup>; SOX9OE* mice at 8 weeks of age. (F-G) Relative expression levels of *Arid1a* (F) and human *Sox9* (G) in spheroids cultured from crypts of control *Arid1a<sup>ff</sup>* and *Villin-Cre; Arid1a<sup>ff</sup>; SOX9OE* intestines, as determined by q-PCR using spheroid RNA (n = 3). (H) Macroscopic image of LacZ staining (left panel), staining for *Arid1a* and LacZ (middle panel), and staining for GFP and LacZ (right panel) in *Lgr5<sup>CreERT2/+</sup>; Rosa<sup>lacZ/+</sup>; Arid1a<sup>ff</sup>; SOX9OE* mice at 3 days after the last tamoxifen injection. Scale bars: 100  $\mu$ m (B, E, H). Quantitative data are presented as means  $\pm$  S.D. \*  $P < 0.05$ , \*\*  $P < 0.01$ , \*\*\*  $P < 0.001$ .

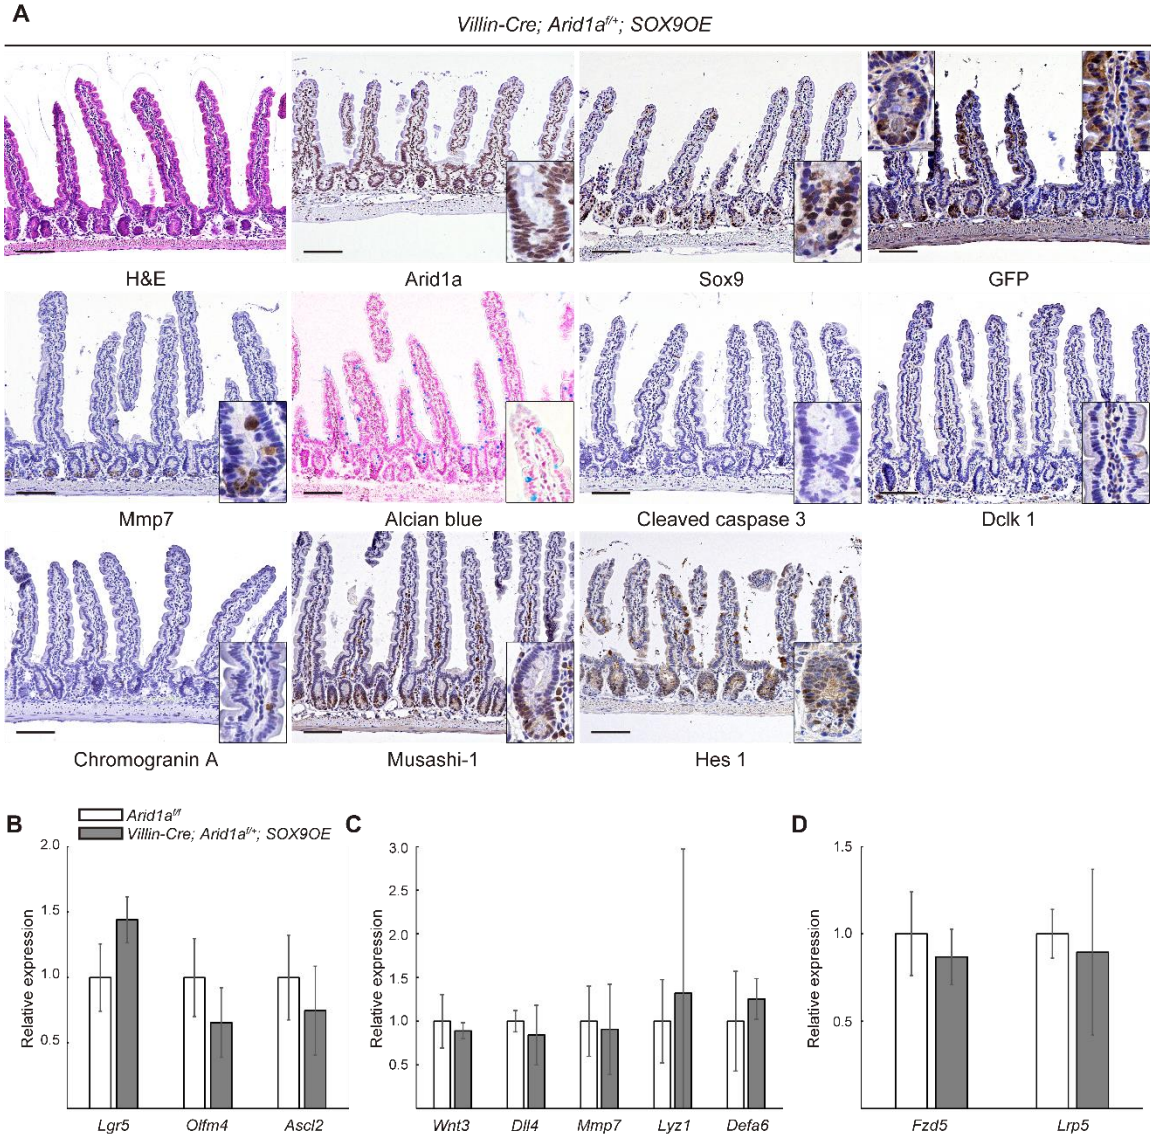

**Fig. S8. There are no differences between *Villin-Cre; Arid1a<sup>fl/+</sup>; SOX9OE* and control *Arid1a<sup>fl/fl</sup>* mice in intestinal architecture, cellular differentiation, and relative expression levels of ISC markers and Wnt receptor genes**

(A) H&E, Arid1a, Sox9, GFP, Mmp7, alcian blue, cleaved caspase 3, Dclk1, chromogranin A, Musashi-1, and Hes1 staining of the small intestines in *Villin-Cre; Arid1a<sup>fl/+</sup>; SOX9OE* mice at 8 weeks of age. Scale bars: 100  $\mu$ m. (B-D) Relative expression levels of ISC markers (B), Paneth cell markers (C), and Wnt receptor genes (D) in control *Arid1a<sup>fl/fl</sup>* and *Villin-Cre; Arid1a<sup>fl/+</sup>; SOX9OE* intestines, as determined by q-PCR using crypt RNA (n = 3). Quantitative data are presented as means  $\pm$  S.D.



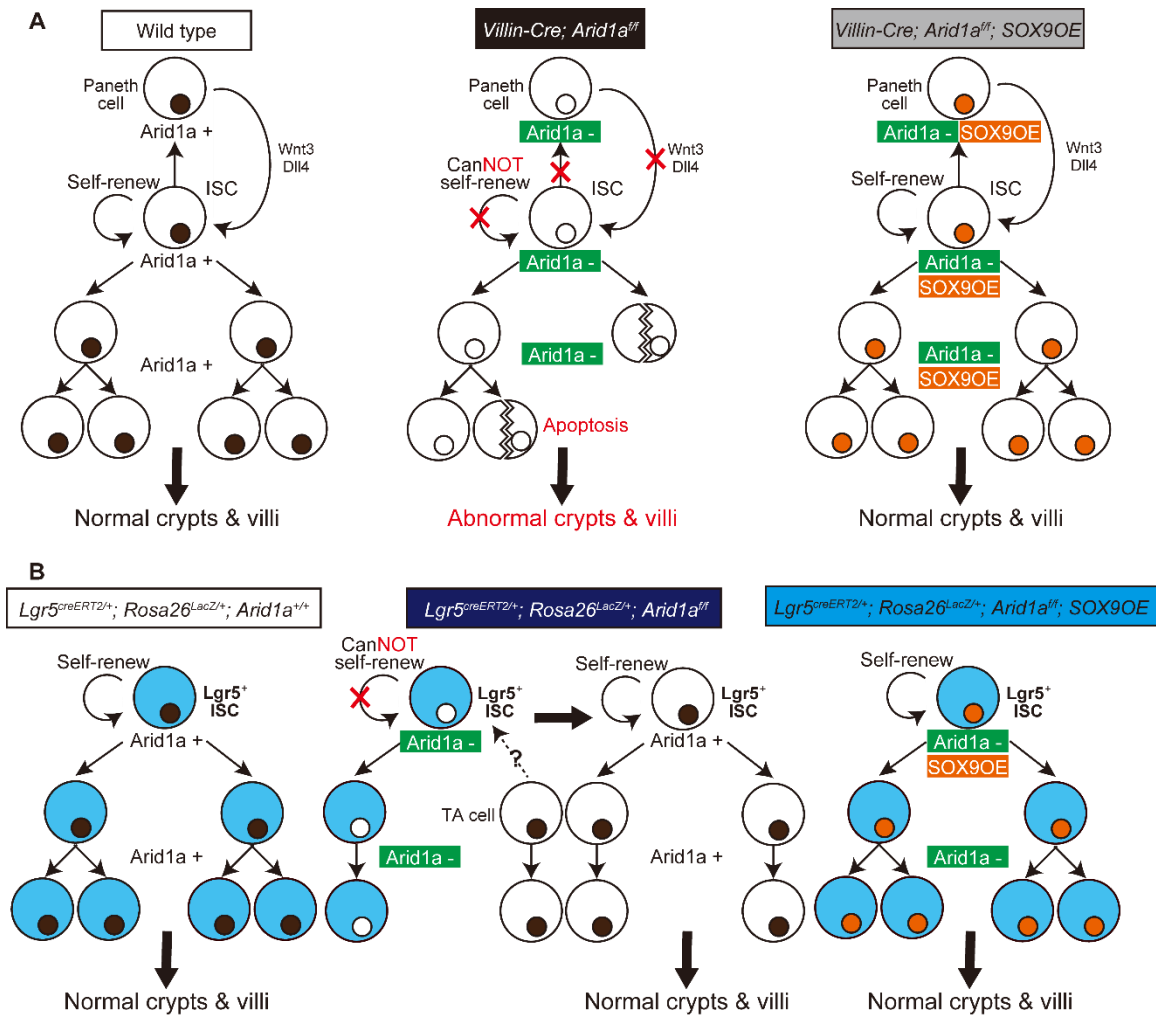

**Fig. S9. Arid1a is indispensable for maintenance of ISCs and intestinal homeostasis in the small intestines of mice**

(A) Schema of *Arid1a*-deletion in intestinal epithelial cells. Deletion of *Arid1a* in intestinal epithelial cells results in impaired self-renewal of ISCs, depletion of Paneth cells, which produce Wnt3 and Dll4, increased apoptosis in cells of crypts and villi, and abnormal crypt-villous architecture in *Villin-Cre; Arid1a<sup>ff</sup>* mice (middle panel). Deletion of *Arid1a* concomitant with *Sox9* overexpression in intestinal epithelial cells restores ISCs and Paneth cells as well as the normal architecture of crypts and villi, and prevents apoptosis in *Villin-Cre; Arid1a<sup>ff</sup>; SOX9OE* mice (right panel). (B) Schema of *Arid1a*-deletion in Lgr5<sup>+</sup> ISCs with lineage tracing. Deletion of *Arid1a* in Lgr5<sup>+</sup> ISCs results in impaired self-renewal of ISCs. However, the intestinal architecture of crypts and villi is normal in *Lgr5<sup>CreERT2/+</sup>; Rosa<sup>lacZ/+</sup>; Arid1a<sup>ff</sup>* mice, in which *Arid1a*-deleted Lgr5<sup>+</sup> ISCs are compensated and replaced by Arid1a<sup>+</sup> Lgr5<sup>+</sup> ISCs, and ISCs and their progeny cells are negative for lacZ staining (middle panel). Deletion of *Arid1a* concomitant with *Sox9* overexpression in Lgr5<sup>+</sup> ISCs restores self-renewal of *Arid1a*-deleted Lgr5<sup>+</sup> ISCs, and thereby, ISCs and their progeny cells are positive for lacZ staining in *Lgr5<sup>CreERT2/+</sup>; Rosa<sup>lacZ/+</sup>; Arid1a<sup>ff</sup>; SOX9OE* mice (right panel).

**Table S1. A list of genes included in each GO terms**

| GO terms                                   | Gene    |         |         |         |         |         |         |         |          |         |
|--------------------------------------------|---------|---------|---------|---------|---------|---------|---------|---------|----------|---------|
| Apoptotic process                          | Cflar   | Gpx1    | Rbm25   | Traf1   | Pak1    | Bcl2l14 | Arl6ip5 | Irf1    | Nek6     | Fhit    |
|                                            | Prkca   | Ube2d3  | Blcap   | Map3k5  | Nupr1   | Itgav   | Acaa2   | Shf     | Cdkn1a   | Lgals7  |
|                                            | Ep300   | Fam3b   | Gsn     | Rnf186  | Naip2   | Trim69  | Dab2ip  | Epha2   | Fgfr2    | Naip1   |
|                                            | Krt8    | Cdip1   | Etv6    | Rassf6  | Rb1     | Gadd45b | Gsk3b   | Rock2   | Stk25    | Egln3   |
|                                            | Bcl2l1  | Tnfsf12 | Dedd    | Sap30bp | Babam2  | Ero1l   | Phlpp1  | Nfatc4  | Smad3    | Abl1    |
|                                            | Mecom   | Gabarap | Psen1   | Tax1bp1 | Sgms1   | Mef2d   | Naif1   | Pls1    | Casp8    | Purb    |
|                                            | Rffl    | Dyrk2   | Mtch2   | Naip5   | Sort1   | Ddit4   | Shb     | Rmdn3   | Mcl1     | Vil1    |
|                                            | Cdca7   | Birc6   |         |         |         |         |         |         |          |         |
| Cell cycle                                 | Fbxl18  | Mapk6   | Rhoa    | Camk2d  | Btbd18  | Hnrnpu  | Rab11a  | Specc1l | Irf1     | Ttk1    |
|                                            | Bcl2l1  | Pard6b  | Pibf1   | Ereg    | Exd1    | Babam2  | Wee1    | Smpd3   | Blcap    | Usp3    |
|                                            | Gadd45a | Phb2    | Cdkn1a  | Cltc    | Nsmce2  | Ect2    | Cdk6    | Ezh2    | Ep300    | Zfyve19 |
|                                            | Tubgcp4 | Nsun2   | Lin9    | Mei1    | Epb41l2 | Cdk11b  | Incenp  | Dab2ip  | Ctnnb1   | Terb2   |
|                                            | Csnk1a1 | Txnip   | Rb1     | Rad51   | Wapl    | Ezr     | Gsk3b   | Rock2   | Nup153   | Uba3    |
|                                            | Fbxw11  | Knstrn  | Mtus1   | Anapc2  | Cdkn1b  | Msh5    | Tcf7l2  | Tubg2   | Mad2l1bp | Acvr1   |
|                                            | Nek6    | Stard13 | Cep192  | Cep55   | Ckap5   | Cltc    | Pds5a   | Aurkb   | Gnai3    | Ptpn6   |
|                                            | Kif3b   | Cdc25b  | Cables2 | Appl1   | Insc    | Cd2ap   | Syne2   | Smad3   | Ppp2ca   | Camk2d  |
|                                            | Ino80   | Chtf8   | Birc6   | Usp37   | Rcc1    | Rabgap1 | Phf23   | Src     | Sptbn1   | Hjurp   |
|                                            | Mybl2   | Myh9    | Eps8    | Evi5    | Chmp2b  | Notch2  |         |         |          |         |
| Intestinal epithelial cell differentiation | Gata4   | Cbfa2t2 | Gata6   | Cdh1    | Klf5    | Cdx2    | C1galt1 |         |          |         |
| Regulation of Wnt signaling pathway        | Rnf43   | Ctdnep1 | Fermt1  | Snx3    | Lrp4    | Cdh3    | Trpm4   | Smarca4 | Nrarp    | Psen1   |
|                                            | Abl1    | Cdh1    | Csnk1a1 | Ctnnd1  | Mbd2    | Sulf2   | Gsk3b   | Tmem237 | Src      | Lgr4    |
|                                            | Znrf3   | Dab2ip  | Fgfr2   | Nfatc4  | Smad3   | Axin2   | Tcf7l2  | Lrp6    | Notum    | Rbms3   |

**Table S2. A list of used primers in RT-PCR and ChIP-PCR experiments**

| Gene         | primer  | sequence                  | Gene              | primer  | sequence                    |
|--------------|---------|---------------------------|-------------------|---------|-----------------------------|
| <i>Gapdh</i> | forward | AGGTCGGTGTGAACGGATTG      | <i>Fzd5</i>       | forward | GGTGTGCCAGGAAATCACG-        |
|              | reverse | TGTAGACCATGTAGTTGAGGTCA   |                   | reverse | CACAAGCGGCCAGAATTGG-        |
| <i>Mmp7</i>  | forward | CTTACCTCGGATCGTAGTGGA     | <i>Lrp5</i>       | forward | AAGGGTGTGTGTACTGGAC-        |
|              | reverse | CCCAACTAACCTCTGAAGT       |                   | reverse | AGAAGAGAACCTTACGGGACG-      |
| <i>Lyz1</i>  | forward | GGAATGGATGGCTACCGTGG      | <i>Lrp6</i>       | forward | TTGTTGCTTTATGCAAACAGACG-    |
|              | reverse | CATGCCACCCATGCTCGAAT      |                   | reverse | GTTCGTTAATGGCTTCTTCGC-      |
| <i>Defa6</i> | forward | CCTTCCAGTCCAGGCTGAT       | <i>Dll4</i>       | forward | TTCCAGGCAACCTTCTCCGA-       |
|              | reverse | TGAGAAGTGGTCATCAGGCAC     |                   | reverse | ACTGCCGCTATTCTTGTCCC-       |
| <i>Lgr5</i>  | forward | TCCTAGAAGAGTTACGTCTTGCT   | <i>Wnt2b</i>      | forward | CACCCGGACTGATCTTGTCT-       |
|              | reverse | CCTTGGGAATGTGTGTCAAAGC    |                   | reverse | TGTTTCTGCACTCCTTGCAC-       |
| <i>Olfm4</i> | forward | CAGCCACTTTCCAATTTACTG     | <i>Wnt4</i>       | forward | AACGGAACCTTGAGGTGATG-       |
|              | reverse | GCTGGACATACTCTTCACCTTA    |                   | reverse | GGACGTCCACAAAGGACTGT-       |
| <i>Ascl2</i> | forward | AAGCACACCTTGACTGGTACG-    | <i>Wnt5a</i>      | forward | CACGCTATACCAACTCTCTGC-      |
|              | reverse | AAGTGGACGTTTGCACCTTCA-    |                   | reverse | AATATTCCAATGGGCTTCTTCATGGC- |
| <i>Sox9</i>  | forward | AACATGGAGGACGATTGGAG-     | <i>Wnt6</i>       | forward | CGGAGACGATGTGGACTT-         |
|              | reverse | TCCCTCAAATGGTAATGAG-      |                   | reverse | GGAACCCGAAAGCCCATG-         |
| <i>Axin2</i> | forward | TGACTCTCCTCCAGATCCCA-     | <i>Arid1a</i>     | forward | GACCCCTCAGTCATCCAGTC-       |
|              | reverse | TGCCCACACTAGGCTGACA-      |                   | reverse | GAGTATGGGTTAGTCCCACCA-      |
| <i>Tcf4</i>  | forward | CGAAAAGTTCTCCGGGTTTG-     | <i>Arid1b</i>     | forward | GTTGTATGGGATGGTACTCAC-      |
|              | reverse | CGTAGCCGGGCTGATTCAT-      |                   | reverse | CTGGTTGTAGTATGGCTGCTG-      |
| <i>Hes1</i>  | forward | CGGCATTCCAAGCTAGAGAAGG-   | <i>hu Sox9</i>    | forward | AGCGAACGCACATCAAGAC-        |
|              | reverse | GGTAGGTGATGGCGTTGATCTG-   |                   | reverse | CTGTAGGCGATCTGTTGGGG-       |
| <i>Wnt3</i>  | forward | TGGAAGTGTACCACCATAGATGAC- | <i>Sox9 site1</i> | forward | ACACCAGCTTCGTTGAACCAGAG-    |
|              | reverse | ACACCAGCCGAGGCGATG-       |                   | reverse | GGAAGCAAATGTTGGGTGACTCA-    |
| <i>Wnt6</i>  | forward | CGGAGACGATGTGGACTT-       | <i>Sox9 site2</i> | forward | ACTTGTCAAGTCAAGTCCGGCTG-    |
|              | reverse | GGAACCCGAAAGCCCATG-       |                   | reverse | TGTGGTACTGGAGCTTCTGCTG-     |
| <i>Fzd4</i>  | forward | TGCCAGAACCTCGGCTACA-      | <i>Sox9 site3</i> | forward | CGAGCTTTCAAAGCATCCCAAAGA-   |
|              | reverse | ATGAGCGGCGTGAAGTTGT-      |                   | reverse | TGATAAAGCGAATCGGCCTGTATC-   |

## References

1. Sato T, *et al.* (2011) Paneth cells constitute the niche for Lgr5 stem cells in intestinal crypts. *Nature* 469(7330):415-418.
2. Barker N, *et al.* (2007) Identification of stem cells in small intestine and colon by marker gene Lgr5. *Nature* 449(7165):1003-1007.
3. Sato T, *et al.* (2009) Single Lgr5 stem cells build crypt-villus structures in vitro without a mesenchymal niche. *Nature* 459(7244):262-265.
4. Sato T & Clevers H (2013) Growing self-organizing mini-guts from a single intestinal stem cell: mechanism and applications. *Science* 340(6137):1190-1194.
5. Subramanian A, *et al.* (2005) Gene set enrichment analysis: a knowledge-based approach for interpreting genome-wide expression profiles. *Proc Natl Acad Sci U S A* 102(43):15545-15550.
6. Miyoshi H & Stappenbeck TS (2013) In vitro expansion and genetic modification of gastrointestinal stem cells in spheroid culture. *Nat Protoc* 8(12):2471-2482.
